# Supplementary material
Source: PubMed Central journal article supplement (PMC10966881)
Supplement: media-1.pdf [file media-1.pdf]

# Supplemental Materials: Fine-Grained Forecasting of COVID-19 Trends at the County Level in the United States

Tzu-Hsi Song , Leonardo Clemente , Xiang Pan , Junbong Jang , Mauricio  
Santillana<sup>\*</sup> , and Kwonmoo Lee<sup>\*\*</sup>

<sup>\*</sup>Mauricio Santillana: m.santillana@northeastern.edu

<sup>\*\*</sup>Kwonmoo Lee: Kwonmoo.Lee@childrens.harvard.edu

**This PDF File includes:**

- Tables S1 to S4
- Figures S1 to S7

Table S1: Comparison of Forecasting Models with different training format at State Level

| Models          | 1 <sup>st</sup> day  |                   | 7 <sup>th</sup> day           |                              | 14 <sup>th</sup> day           |                              |
|-----------------|----------------------|-------------------|-------------------------------|------------------------------|--------------------------------|------------------------------|
|                 | RMSE                 | RRMSE(%)          | RMSE                          | RRMSE(%)                     | RMSE                           | RRMSE(%)                     |
| Autoregressive* | 2919.32±20428.46     | 78.63±686.99      | 3600.42±1.31x10 <sup>13</sup> | 101.39±5.41x10 <sup>11</sup> | 15141.28±5.32x10 <sup>23</sup> | 591.01±2.45x10 <sup>22</sup> |
| GRU*            | 2614.1±5706.59       | 75.69±38.71       | 2681.13±5703.73               | 76.08±42.74                  | 2905.47±5716.06                | 82.43±34.63                  |
| LSTM*           | 2769.32±5701.13      | 71.69±19.52       | 2764.88±5721.4                | 72.11±18.9                   | 2940.21±5707.36                | 79.55±16.32                  |
| biLSTM*         | 2340.29±5475.5       | 68.51±15.85       | 2521.58±5473.84               | 70.93±16.95                  | 2743.3±5483.12                 | 77.91±19.24                  |
| biLSTM          | 371±1047.57          | 12.44±15.04       | 1189.43±1806.38               | 28.9±14.01                   | 1940.18±3216.91                | 49.46±17.18                  |
| FIGI-Net        | <b>290.31±908.81</b> | <b>9.17±13.59</b> | <b>1149.66±1850.66</b>        | <b>26.94±14.48</b>           | <b>1935.36±3458.21</b>         | <b>49.12±16.47</b>           |

\*: directly use State data for model training

Table S2: Comparison of FIGI-Net against the baseline models in 1 week horizons at the county level.

| Models         | RMSE                         | RRMSE                      |
|----------------|------------------------------|----------------------------|
| Autoregressive | 212.18±2.44x10 <sup>10</sup> | 83.32±4.16x10 <sup>9</sup> |
| Persistence    | 81.24±302.06                 | 37.38±14.77                |
| GRU            | 48.4±254.14                  | 26.32±88.23                |
| LSTM           | 52.09±240.49                 | 26.69±61.04                |
| TC-LSTM        | 57.32±281.55                 | 28.39±19.87                |
| TC-biLSTM      | 40.4±222.56                  | 20.27±16.62                |
| biLSTM         | 36.63±180.55                 | 18.57±57.39                |
| FIGI-Net       | <b>34.16±190.24</b>          | <b>17.13±16.49</b>         |
| CDC            | 157.49±1285.95               | 76.24±78.71                |

Table S3: Comparison of FIGI-Net and baseline models for the 2 week horizon task at the county level

| Models         | RMSE                       | RRMSE                      |
|----------------|----------------------------|----------------------------|
| Autoregressive | 99.79±6.78x10 <sup>5</sup> | 45.25±1.17x10 <sup>5</sup> |
| Persistence    | 125.12±510.7               | 61.67±11.62                |
| GRU            | 63.89±305.64               | 33.3±116.39                |
| LSTM           | 72.64±317.59               | 32.85±48.7                 |
| TC-LSTM        | 71.7±334.39                | 36.8±25.69                 |
| TC-biLSTM      | 69.59±311.8                | 34.03±22.64                |
| biLSTM         | 59.25±283.61               | 29.88±31.89                |
| FIGI-Net       | <b>58.43±282.14</b>        | <b>29.36±21.21</b>         |
| CDC            | 157.58±1090.97             | 76.49±66.24                |

Table S4: Comparison of training duration identification for the proposed model across 1-week and 2-week forecasting horizons

| Training Length   | 1 week      |                | 2 week      |                |
|-------------------|-------------|----------------|-------------|----------------|
|                   | RMSE        | R <sup>2</sup> | RMSE        | R <sup>2</sup> |
| 30 days           | 24.45±14.31 | 0.864          | 29.79±11.45 | 0.861          |
| 45 days           | 26.28±14.49 | 0.944          | 26.42±13.33 | 0.912          |
| 60 days           | 19.04±13.28 | 0.968          | 24.97±14.59 | 0.933          |
| 75 days (Optimal) | 14.39±11.23 | 0.977          | 22.71±12.46 | 0.937          |
| 90 days           | 12.74±9.66  | 0.978          | 20.26±12.66 | 0.943          |

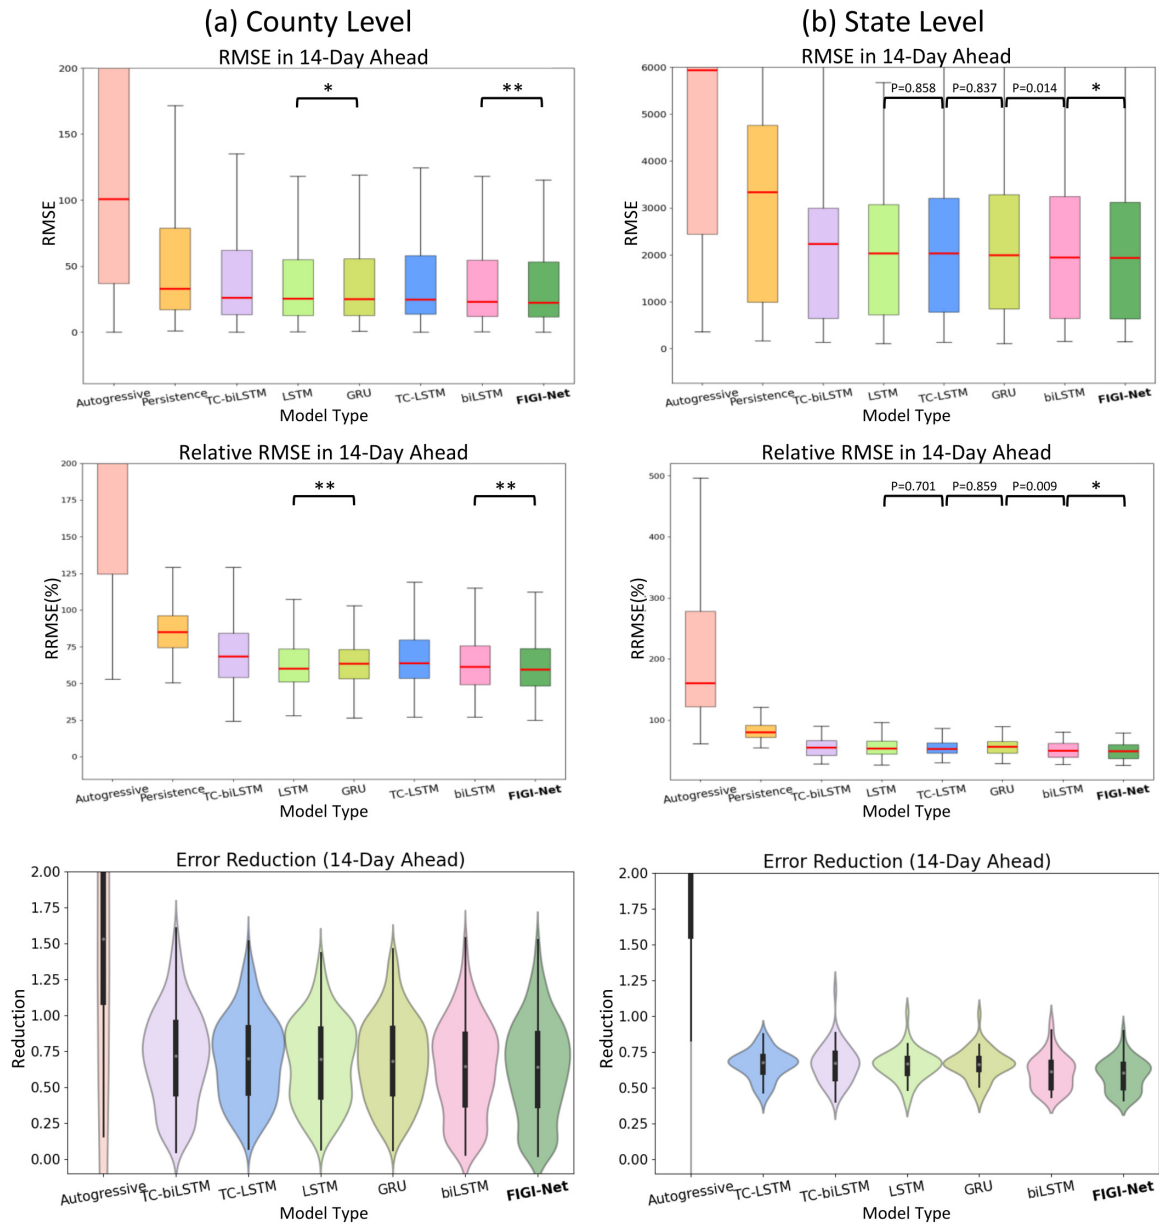

Figure S1: Comparison of Root Mean Squared Error (RMSE), relative RMSE, and error reduction across various models is conducted for a 14-day forecast horizon, analyzed at both (a) county and (b) state levels. The performance assessment reveals that the deep learning-based model exhibits comparable forecasting capability within the 14-day horizon. Furthermore, the FIGI-Net model demonstrates a significant reduction in forecasting errors, approximately 35% at the county level and 50% at the state level, when compared to the persistence model.

: p-value < 0.005  
 \*: p-value < 0.001

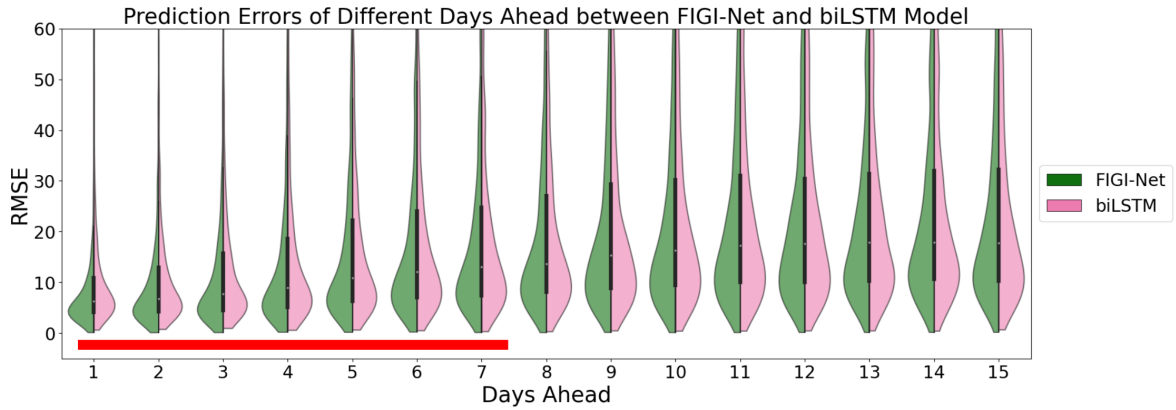

Figure S2: Comparison of RMSE between FIGI-Net and biLSTM across various forecast horizons. Our results indicate that our model yields lower prediction errors for infection numbers within the first 7 days of prediction compared to biLSTM (as indicated by the red line).

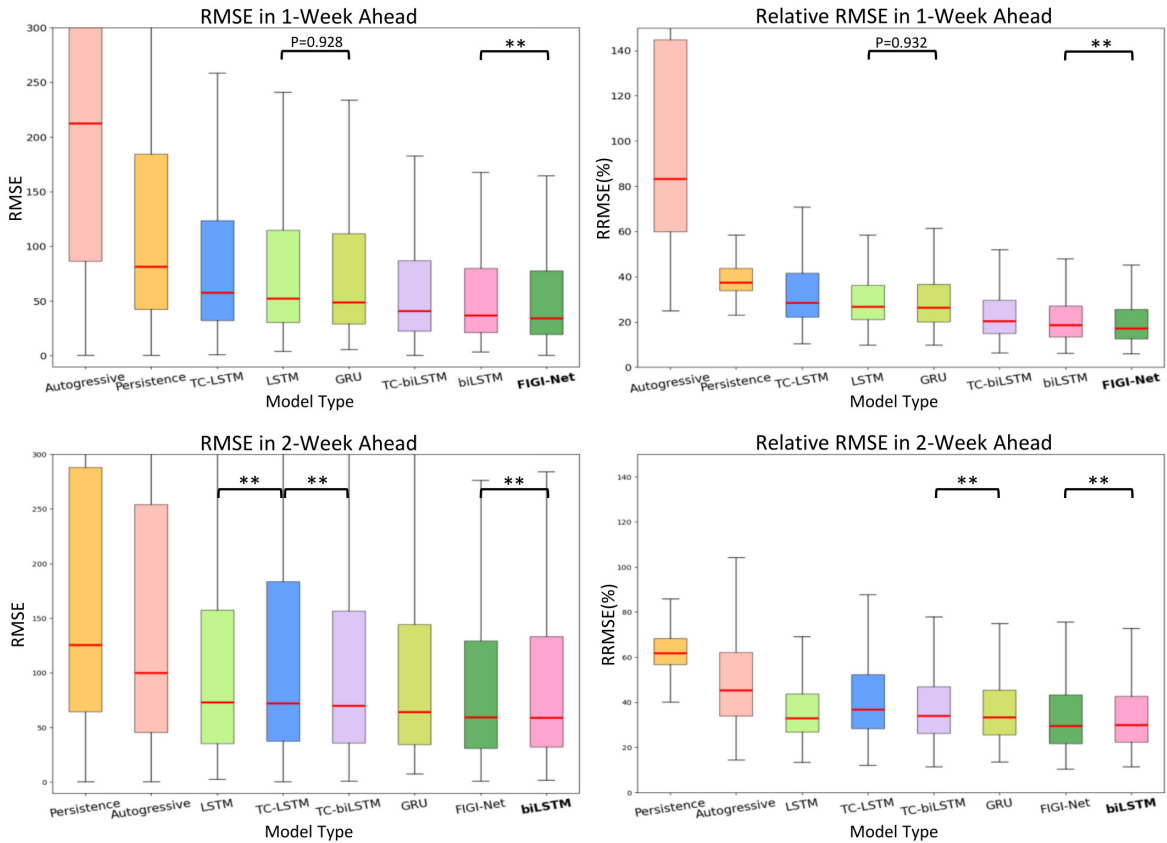

Figure S3: Comparison of various models at the county level across 1 and 2 week ahead horizons. The models are sorted in descending order based on their RMSE values. Notably, our FIGI-Net model demonstrates accurate prediction performance and places among the top 2 with lowest RMSE.

\*: p-value < 0.001

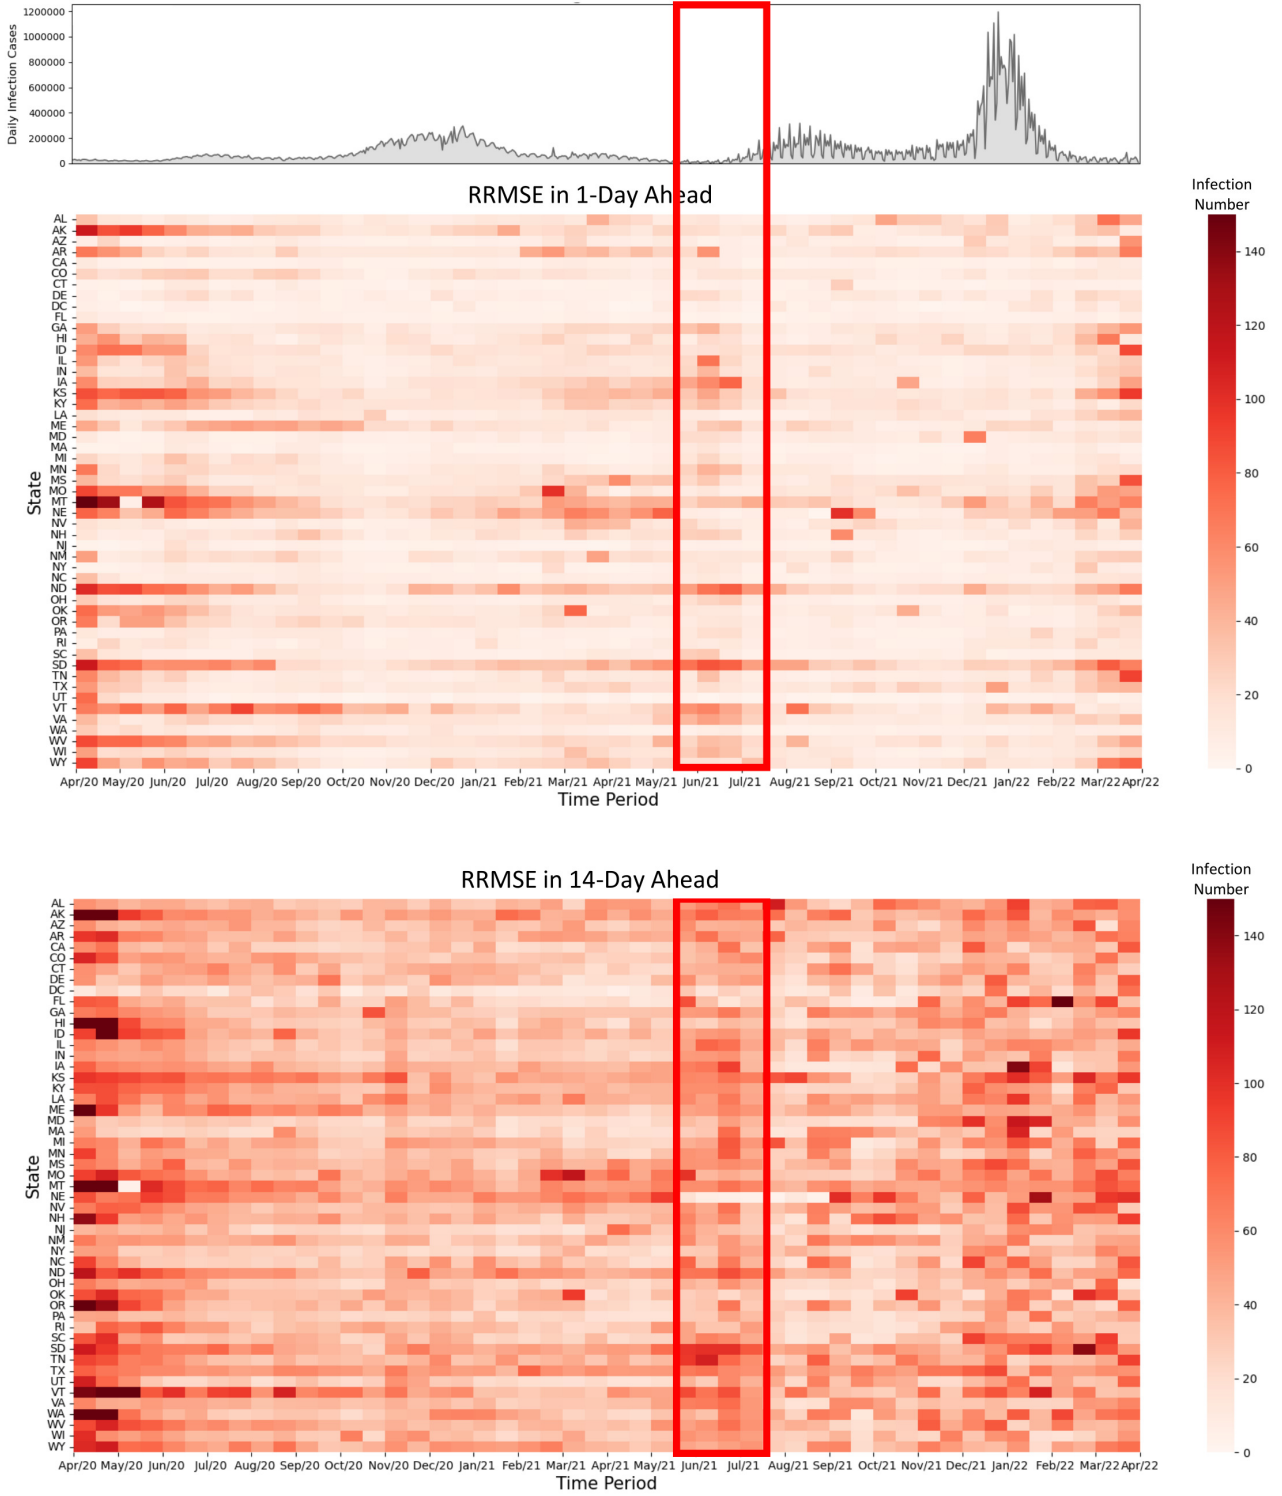

Figure S4: Evolution of prediction error for FIGI-Net at state level. Each column represents the average relative RMSE (each average is computed using a non-overlapping 15-day period between April 2020 and April 2022) across US states for the 1-day and 14-day horizons, compared to the national reported infection trend. We can clearly observe that Missouri, Montana, and Nebraska have large RRMSE values during March 2021 to May 2021 in 1-day ahead prediction. In addition, we can observe that the RRMSE errors increase before the early stage of the next outbreaks (red rectangle).

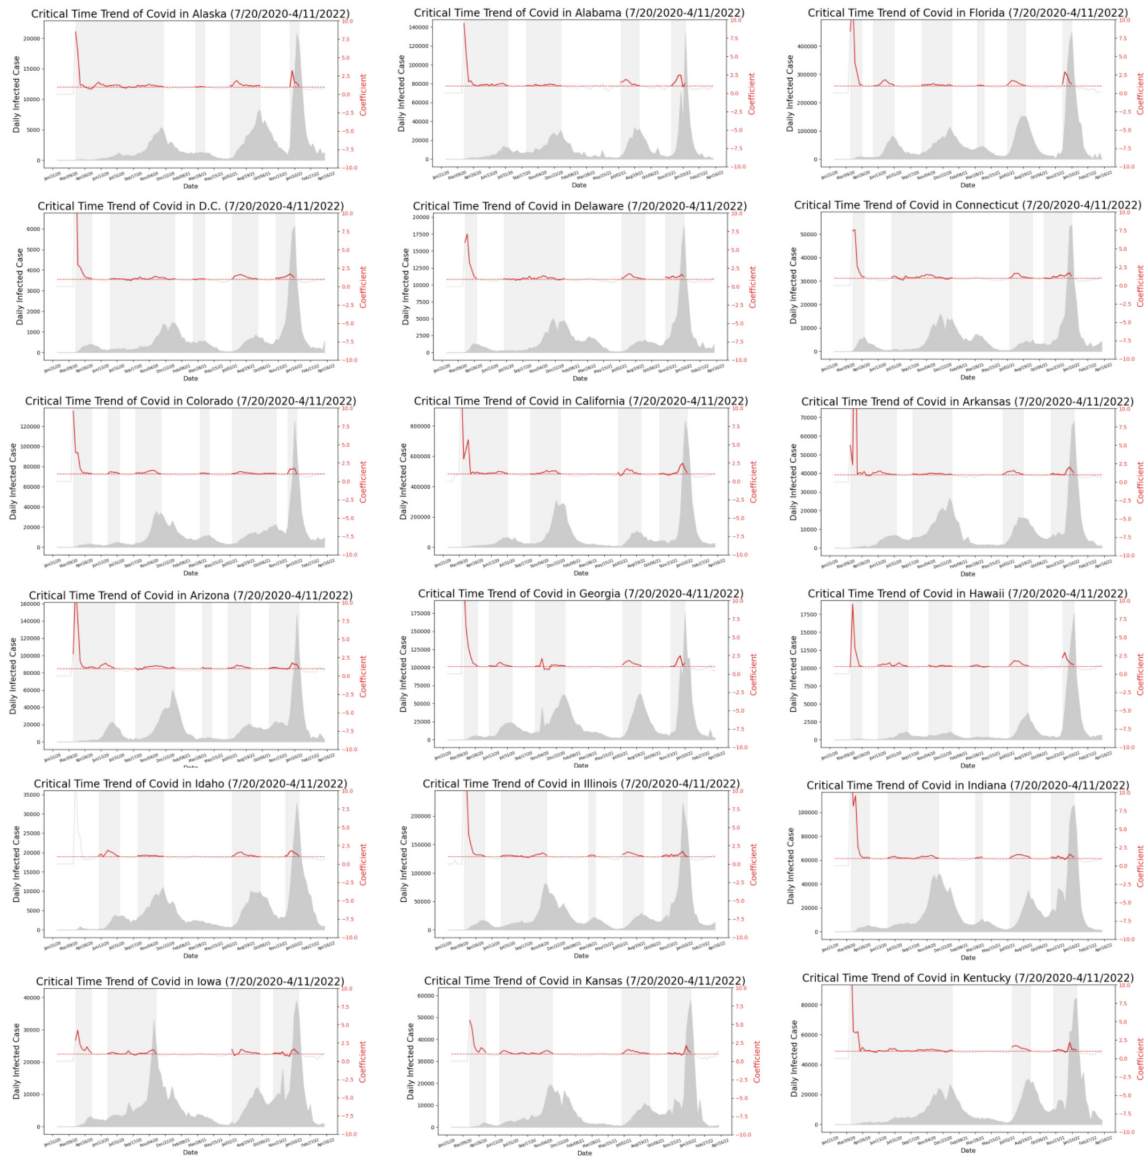

Figure S5: COVID-19 Critical Time Periods for each state in US (Part I). The critical time periods were created by independently quantifying the trend of COVID-19 confirmed cases across each state, and identifying the time periods when the value of the trend exceeded the threshold of 1.0 (marked with a red-dash line in every figure).

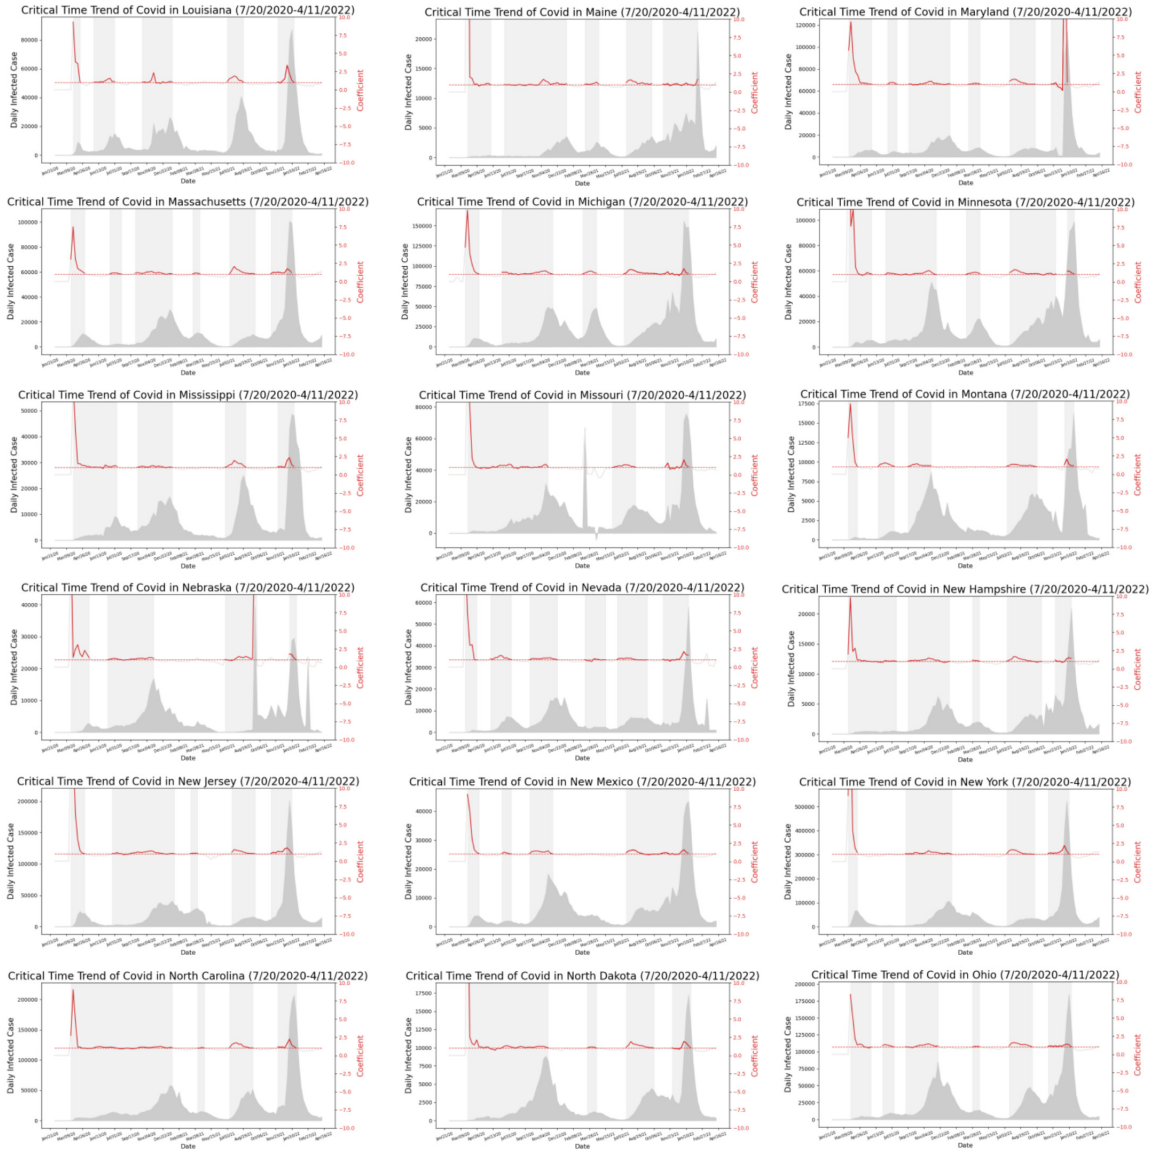

Figure S6: COVID-19 Critical Time Periods for each state in US (Part II).

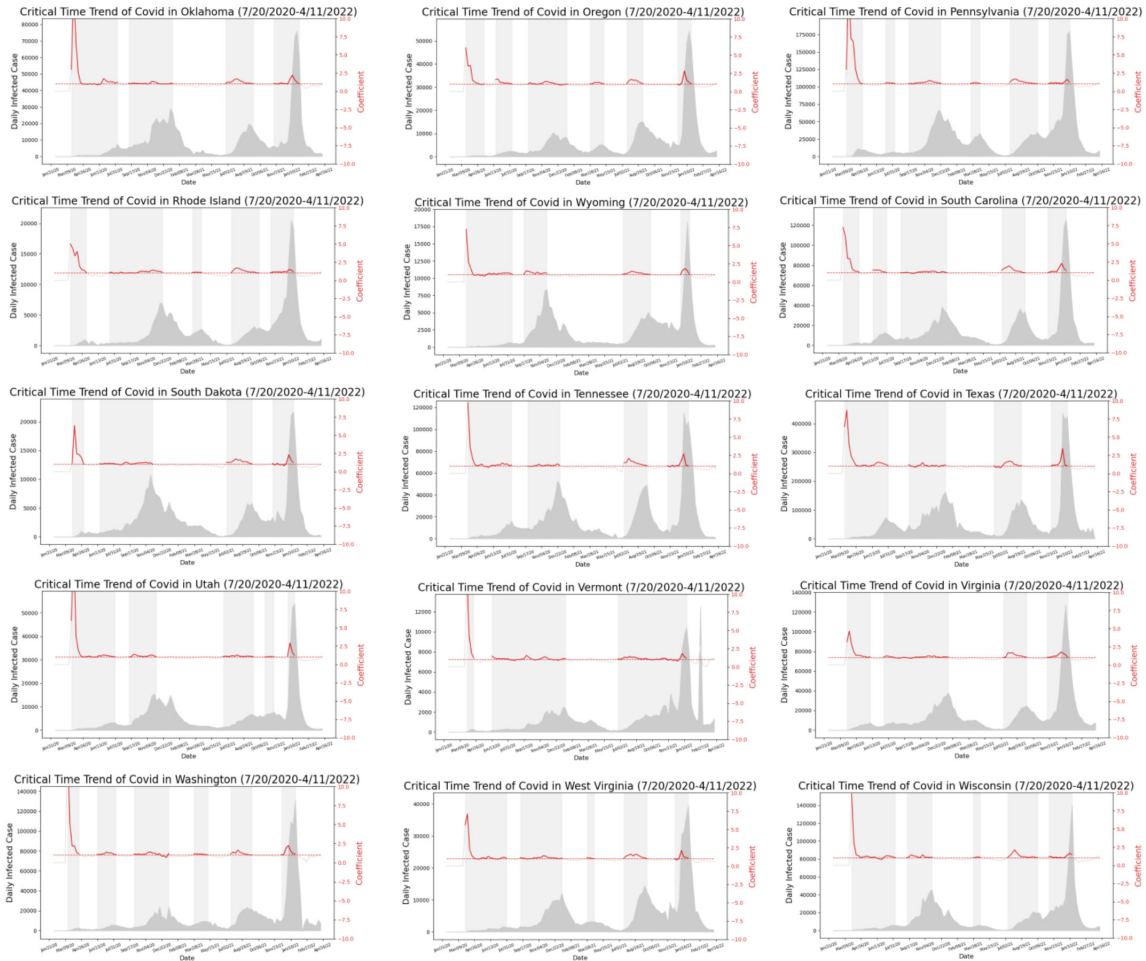

Figure S7: COVID-19 Critical Time Periods for each state in US (Part III).
